# Supplementary material for: Elucidating modern West Antarctic sea surface conditions: Anintercomparison of lipid biomarker proxies, instrumental andnumerical-model data
Source: Copernicus journal article supplement (doi:10.5194/cp-2021-19), 2021-03-01
Supplement: Supplementary file 2 [file TableS1.xlsx]

## Sheet: TableS1
Table S1. Station list, TOC and biomarker data. Stations with * are previously published data by Vorrath et al. (2019). PIPSO25 indeces for each sampling site were calculated using a concentration balance factor (c). PIPSO25 values displayed in italics have been set to 1.
Station Nr.	Long [°E]	Lat [°N]	Water Depth [m]	TOC [wt. %]	IPSO25 [µg/g OC]	HBI Z-Triene [µg/g OC]	HBI E-Triene [µg/g OC]	Brassicasterol [µg/g OC]	Dinosterol [µg/g OC]	PZIPSO25 (c=1.847)	PEIPSO25 (c=5.413)	PBIPSO25 (c=0.009)	PDIPSO25 (c=0.027)	TEXL86-derived SOT [°C]	RI'-OH-derived SST [°C]	BIT-index (< 0.3)
PS69/251-1														2.22222	0.737688	0.044232
PS69/255-3	-104.361	-71.7972	640	0.332249	2.17715	0.490332	0.0502716			0.706252	0.8889			2.39113	1.63526	0
PS69/269-1	-115.577	-73.2192	822	0.905171	0.358907	0.0360985	0			0.84335	1			0.409654	-0.887301	0.0176343
PS69/272-3	-118.478	-73.892	1529	0.301692	0.0376507	0	0	1.85878	2.73634	1	1	0.691228	0.338727	0.468275	-1.82659	0.0610309
PS69/275-2	-117.548	-73.8887	1472	0.454202	0.213565	0.0312516	0	5.01406	5.40612	0.78725	1	0.824788	0.595248	2.12535	-1.55056	0.0448987
PS69/283-5	-115.377	-72.7643	588	0.524586	0.0830759	0.0163942	0.00855566	120.48	9.74159	0.7329	0.64209	0.0708117	0.240973	-2.02011	-1.02685	0.0259679
PS69/284-2	-115.402	-73.02	736	0.862167	0.0982183	0.00622819	0.00314547	171.151	10.8695	0.895169	0.85227	0.0596411	0.251718	1.97038	-0.041256	0.0230247
PS69/288-3	-102.992	-74.4152	742	0.408483	0.896283	0.0184767	0.00284669	6.95668	6.13517	0.963325	0.9831	0.934379	0.844686	2.13485	-0.991339	0.0274778
PS69/292-3	-105.193	-74.6825	1113	0.355218	0.435225	0	0			1	1
PS69/297-1	-103.668	-74.0798	460	0.42543	3.32654	0.103814	0.0140077			0.945507	0.97772			-0.71689	-0.343845	0.0247204
PS69/299-1	-103.648	-73.4437	685	0.446119	0.589546	0.268126	0.0316581			0.543503	0.7748			1.4874	1.06873	0.0324971
PS69/302-3	-105.651	-71.1302	544	0.165479	1.26694	1.87864	0.206788			0.267493	0.53095			-0.33859	-0.0636049	0.006465
PS104/012-4	-101.624	-74.6835	358	0.223796	0.0810095	0	0	26.2515	1.9502	1	1	0.254317	0.607289		-2.6178	0.0397663
PS104/014-2	-102.586	-74.549	600	0.593611	2.06612	0.0879107	0.0307976	220.539	20.6037	0.927147	0.92534	0.508697	0.788725	-0.984145	-0.219199	0.00459281
PS104/017-2	-104.747	-74.3593	1395	0.779866	0.556729	0.0278254	0.00959256	43.8533	5.35487	0.915498	0.9147	0.583867	0.79468	2.81165	-0.458661	0.0468161
PS104/022-3	-107.092	-72.7679	733	0.584908	1.01302	0.0548957	0.0295748	187.134	21.0407	0.909027	0.86354	0.374328	0.641879	2.78353	-0.666088	0
PS104/043-3	-112.329	-73.2972	482	0.568226	0.455151	0.0278675	0.00404155	107.429	10.5737	0.898414	0.95414	0.318914	0.615753	-0.7228	-0.916907	0.025787
PS111/13-2	-6.85151	-70.0937	1775	0.333037	0	0.165488	0.318247	40.0704	9.18575	1	1	1	1	1.96875	-0.279365	0.00582981
PS111/15-1	-15.7836	-71.6653	1405	0.27826	0	0.0667666	0.128147	24.1264	5.24197	1	1	1	1	1.20244	-0.142105	0.00595523
PS111/16-3	-17.8167	-72.3843	1418	0.244391	0	0.0841336	0.0852892	41.156	10.2046	1	1	1	1	1.17399	-1.27133	0.0100806
PS111/27-1	-29.0823	-75.9549	425	0.176577	1.12159	0.349099	0.170593	97.3357	6.20751	0.634994	0.54847	0.56015	0.870573	0.0578888	-1.04759	0.00863174
PS111/29-3	-27.6803	-75.9717	411	0.1117	0	0.679085	0.41304	56.9398	6.82596	1	1	1	1	-1.16409	-2.02528	0.00748131
PS111/40-2	-54.2395	-76.0009	513	0.453313	0	0.0390656	0.0294955	9.18199	2.01828	1	1	1	1	-0.986856	-1.6963	0.0408442
PS111/42-1	-53.3566	-76.145	493	0.382471	13.414	0.533708	0.0822493			0.931551	0.96788
PS111/47-2	-60.001	-74.9847	660	0.504338	2.5304	0.0777251	0	19.3934	4.87532	0.946319	1	0.93515	0.950792	-0.114182	-1.50873	0.00874494
PS111/53-3	-54.1209	-76.0259	497	0.461417	6.4037	0.326637	0.101058	41.0988	10.5524	0.91391	0.9213	0.945116	0.957612	-0.696642	-1.48568	0.0149316
PS111/60-3	-45.4094	-77.0161	332	0.181462	4.32128	0.199769	0.0702592	61.8766	12.9955	0.921341	0.91912	0.8853	0.925256	0.105297	-1.22047	0.00713802
PS111/70-2	-33.6549	-76.1125	794	0.516895	21.3456	0.887899	0.157596	139.965	8.62779	0.928661	0.96157	0.943993	0.989259	-1.78473	-1.45218	0.00861687
PS111/80-3	-35.4299	-76.6416	932	0.420005	8.32201	0.291055	0.0909276	77.55	9.05418	0.939329	0.94416	0.92224	0.971605	0.325691	-1.68851	0.00829641
PS111/98-3	-40.4546	-77.8012	928	0.389705	15.0918	1.46692	0.248819	33.8535	11.9429	0.847813	0.91807	0.980107	0.979185	0.944824	-2.02569	0.00419095
PS111/114-3	-33.9339	-76.3769	839	0.339729	7.09227	0.155263	0.068254	55.1174	5.89034	0.961142	0.95049	0.934302	0.978177	-0.956583	-1.6176	0.00525814
PS111/131-2	-36.937	-74.6111	387	0.0762462	73.8734	1.04781	0.170192	96.4207	11.8109	0.974474	0.98768	0.988328	0.995724	-1.71044	-1.91906	0
PS111/139-2	-25.2772	-74.8248	663	0.250218	0.508462	0.259971	0.0538562	74.139	5.37006	0.514341	0.63561	0.431161	0.779	-2.38356	-2.15293	0.00350734
PS118/5-3	-57.7529	-64.9834	428	0.610915	16.3193	2.30157	0.555545	39.2207	10.2945	0.793363	0.84441	0.978717	0.983337	-2.03582	-1.61627	0.0188453
PS118/8-4	-55.9049	-63.9754	414	0.825519	17.7356	2.37142	0.553933	121.049	25.3683	0.801969	0.8554	0.941836	0.963	0.371626	-1.06724	0.0303722
PS118/10-3	-55.9768	-64.0025	414	0.861421	13.5375	1.90611	0.536969	127.765	27.2205	0.793632	0.82325	0.921323	0.948756	2.61103	-0.91075	0.0293953
PS118/12-2	-55.7396	-63.809	455	0.21994	12.5874	1.70328	0.625758	86.6323	22.9798	0.800064	0.78797	0.941377	0.953253	4.37399	-0.675944	0.0413582
PS118/24-2	-51.428	-62.2575	3289	0.367981	0.667253	0.102408	0.0615748	17.0972	3.22463	0.779158	0.6669	0.811791	0.885101	0.967223	-1.29763	0.0211634
PS118/38-5	-54.3286	-63.0829	415	0.813428	16.3469	1.62592	0.400753	84.6647	30.7448	0.844818	0.88285	0.955235	0.951909	0.895603	-0.237348	0.0225255
PS118/48-2	-51.1331	-61.5724	2908	0.217761	0.591233	0.158968	0.0930149	14.8728	4.2945	0.668203	0.5401	0.81459	0.83674	2.36658	-1.52049	0.0185574
PS118/62-3	-46.5581	-60.9349	329	0.570909	5.35605	8.49078	1.59456	58.493	18.3265	0.254606	0.38294	0.910072	0.915825	1.4554	-0.997074	0.0194142
PS118/75-1	-49.6541	-60.8527	2643	0.504672	5.32752	1.12372	0.318061	27.7084	7.72815	0.719665	0.75578	0.955056	0.962495	2.60576	-0.238695	0.0159102
PS97/042-1*	-66.1	-59.85	4172	0.253668	0	0.333406	0.1515	12.9969	0.424811	0	0	0	0	8.75483	3.56767	0.0236752
PS97/044-1*	-66.03	-60.62	1202.8	0.0811083	0	1.08031	0	143.688	0	0		0		7.29266	-2.6178	0.00855373
PS97/045-1*	-66.1	-60.57	2292	0.117798	0	1.53148	0.386209	36.9017	3.17202	0	0	0	0	8.01424	4.15235	0.00365439
PS97/046-6*	-65.36	-60	2802.7	0.166586	0	1.35895	0.290719	214.634	101.809	0	0	0	0	7.67056	4.67169	0.00661178
PS97/048-1*	-64.89	-61.44	3455.2	0.222979	0	2.08491	0.375404	1859.61	73.5317	0	0	0	0	8.02073	3.47359	0.0370301
PS97/049-2*	-64.97	-61.67	3752.2	0.24984	0	3.92359	0.851036	719.155	178.446	0	0	0	0	6.59015	2.92597	0.0162193
PS97/052-3*	-64.3	-62.51	2889.8	0.156471	0	0.679419	0	26.5539	0	0		0		5.60967	2.82998	0.0232672
PS97/053-1*	-63.1	-62.67	2021.4	0.333024	0	19.3502	5.94785	13.3564	332.868	0	0	0	0	3.22323	1.10928	0.0231613
PS97/054-2*	-61.35	-63.24	1283.2	0.841177	3.0333	2.67528	1.00001	337.686	48.5793	0.380402	0.35914	0.498182	0.699202	1.09336	-1.41642	0.00515331
PS97/056-1*	-60.45	-63.76	633.4	0.936956	3.23194	0.752336	0.289761	268.19	17.158	0.699352	0.67328	0.571159	0.875192	1.25405	-1.51201	0.00662682
PS97/059-1*	-59.66	-62.44	353.8	0.5878	0.834925	2.52289	1.3054	3.38551	0.0357265	0.151967	0.10568	0.964609	0.998852	3.16827	-0.380912	0.016118
PS97/060-1*	-59.65	-62.59	462.4	0.544059	1.93389	12.9368	4.69275	5017.44	1983.75	0.074884	0.07075	0.0408577	0.0350211	2.69937	-0.898631	0.0118718
PS97/061-1*	-59.8	-62.56	466.6	0.52203	1.01771	4.341	1.86966	302.356	119.512	0.112646	0.09138	0.271138	0.240707	1.77	-1.01392	0.015683
PS97/062-1*	-59.86	-62.57	477.4	0.435449	0.907339	4.04423	1.78656	276.372	88.2721	0.108324	0.08578	0.266238	0.276756	1.79744	-0.975622	0.0171492
PS97/065-2*	-59.36	-62.49	480.1	0.591615	2.41641	9.18408	4.5491	4788.29	1587.31	0.124703	0.08937	0.0528273	0.0536332	2.90293	-0.953736	0.0135145
PS97/067-2*	-59.15	-62.42	793	0.172402	1.78517	4.03778	1.7103	406.567	113.728	0.193158	0.16167	0.326724	0.368829	1.89872	-1.03277	0.0137076
PS97/068-2*	-59.3	-63.17	793.6	0.937048	16.2065	4.55804	1.15204	2096.69	653.977	0.658154	0.72215	0.460704	0.479858	0.456722	-0.918078	0.0144055
PS97/069-1*	-58.55	-62.59	1641.8	1.02247	17.8135	6.11471	1.82399	2472.03	774.345	0.612022	0.64341	0.443334	0.461325	1.87265	-1.6496	0.00433709
PS97/072-2*	-56.07	-62.01	1991.7	1.06345	13.689	4.9974	1.2771	192.625	40.6865	0.597301	0.66447	0.887058	0.926064	1.87992	-1.65702	0.00374281
PS97/073-2*	-55.66	-61.84	2623.5	0.729163	10.3694	4.28323	1.45087	2388.46	1180.75	0.567267	0.56905	0.32424	0.246383	0.190411	-1.57955	0.00667731
PS97/074-1*	-56.35	-60.87	1831.4	0.167618	0.371046	12.075	3.40885	1539.63	438.073	0.0163666	0.01971	0.0259439	0.0305678	4.50443	0.936959	0.0123117
PS97/077-1*	-55.71	-60.6	3586.5	0.43013	2.26687	16.3558	4.87434	1647.62	589.731	0.0698093	0.07912	0.131988	0.125186	3.58252	0.485055	0.00690106
PS97/079-1*	-59	-60.15	3539.3	0.342428	0	1.89301	0.510289	479.917	154.4	0	0	0	0	5.15168	3.3	0.0410314
PS97/080-2*	-59.64	-59.68	3112.7	0.430469	0	12.0214	2.70455	4019	1329.13	0	0	0	0	7.8737	2.50877	0.0234862
PS97/083-1*	-60.57	-58	3756.3	0.2172	0	18.2555	8.27974	686.502	308.61	0	0	0	0	5.41	1.39473	0.00703667
PS97/084-2*	-60.88	-58.87	3617.4	0.333606	0	26.8573	13.871	1245.65	648.474	0	0	0	0	6.75364	2.57517	0.00710517
