# Supplementary material for: Elucidating modern West Antarctic sea surface conditions: Anintercomparison of lipid biomarker proxies, instrumental andnumerical-model data
Source: Copernicus journal article supplement (doi:10.5194/cp-2021-19), 2021-03-01
Supplement: Supplementary file 3 [file TableS2.xlsx]

## Sheet: TableS2
Table S2. Modelled spring SIC [%] for 1951-2014 CE, 2ka BP, 4ka BP, 6ka BP and modelled annual mean SST and SOT [°C] based on AWIESM2.
Station Nr.	Modelled Spring SIC 1951-2014 CE [%]	Modelled Spring SIC 2ka BP [%]	Modelled Spring SIC 4ka BP[%]	Modelled Spring SIC 6ka BP [%]		Modelled Annual mean SST [°C]	Modelled Annual mean SOT (410 m) [°C]
PS69/255-3	81	86	85	86		-1.12	0.305
PS69/269-1	87	90	90	93		-1.215	0
PS69/272-3	65	75	75	82		-1.0275	0
PS69/275-2	64	75	74	82		-1.0725	0
PS69/283-5	88	91	90	93		-1.1525	0.6875
PS69/284-2	88	91	90	93		-1.1775	0.535
PS69/288-3	35	39	37	41		-0.62	0
PS69/292-3	69	72	71	71		-0.9175	0
PS69/297-1	43	48	45	51		-0.7325	0
PS69/299-1	32	36	33	36		-0.9125	0
PS69/302-3	79	87	87	90		-0.96	0.97
PS104/012-4	32	35	32	36		-0.7	0
PS104/014-2	38	42	40	43		-0.675	0
PS104/017-2	60	66	63	66		-0.775	0
PS104/022-3	78	82	81	84		-1.185	0.1825
PS104/043-3	87	91	90	93		-1.1825	0.2375
PS111/13-2	89	90	90	90		-0.77	-0.7125
PS111/15-1	82	85	85	87		-0.6725	-0.5875
PS111/16-3	84	87	87	88		-0.6175	-0.385
PS111/27-1	66	68	68	70		-0.8275	0
PS111/29-3	46	50	50	53		-0.725	0
PS111/40-2	53	54	54	56		-1.4575	0
PS111/42-1	68	68	68	69		-1.465	0
PS111/47-2	59	61	62	64		-1.4075	-0.92
PS111/53-3	53	54	54	56		-1.4575	0
PS111/60-3	87	86	85	87		-1.5425	0
PS111/70-2	89	89	89	90		-1.165	-1.5975
PS111/80-3	90	89	89	89		-1.2625	-1.7
PS111/98-3	89	87	86	88		-1.295	-1.7075
PS111/114-3	88	87	88	88		-1.0725	-1.5175
PS111/131-2	88	88	89	90		-1.1825	-1.385
PS111/139-2	22	26	28	30		-0.5625	-1.3525
PS118/5-3	41	47	51	56		-0.7425	0
PS118/8-4	34	43	45	49		-0.4925	0
PS118/10-3	34	43	45	49		-0.4925	0
PS118/12-2	33	42	44	49		-0.3325	0
PS118/24-2	46	58	62	67		-0.32	0.755
PS118/38-5	41	54	56	62		-0.525	-0.3975
PS118/48-2	37	51	55	62		-0.1875	0.52
PS118/62-3	32	50	53	65		0.5475	1.2375
PS118/75-1	30	45	49	59		0.2725	1.0625
PS97/042-1*	0	1	1	3		3.6075	2.74
PS97/044-1*	0	1	2	5		3.3	2.665
PS97/045-1*	0	1	1	4		3.4075	2.685
PS97/046-6*	0	1	2	5		2.9675	2.55
PS97/048-1*	2	9	10	17		1.6375	1.98
PS97/049-2*	2	9	10	17		1.6375	1.98
PS97/052-3*	5	18	20	36		1.095	0.6525
PS97/053-1*	7	20	24	40		0.855	0.185
PS97/054-2*	25	44	49	64		0.5075	-0.335
PS97/056-1*	46	55	58	63		0.0775	-0.175
PS97/059-1*	26	44	49	61		0.1025	-0.7775
PS97/060-1*	26	44	49	61		0.1025	-0.7775
PS97/061-1*	29	47	52	63		0.1375	-0.71
PS97/062-1*	29	47	52	63		0.1375	-0.71
PS97/065-2*	26	44	49	61		0.1025	-0.7775
PS97/067-2*	26	44	49	61		0.1025	-0.7775
PS97/068-2*	42	54	57	65		-0.02	-0.86
PS97/069-1*	33	50	55	65		0.005	-0.65
PS97/072-2*	25	41	46	57		-0.0675	-0.4325
PS97/073-2*	23	39	44	55		0.0975	-0.3525
PS97/074-1*	7	17	19	33		0.7775	0.5
PS97/077-1*	4	11	12	25		1.5025	0.965
PS97/079-1*	1	5	6	12		2.1875	1.6175
PS97/080-2*	0	2	3	7		2.4	1.915
PS97/083-1*	0	0	0	0		5.4425	3.64
PS97/084-2*	0	1	1	4		3.1675	2.4025
