# Supplementary material for: Elucidating modern West Antarctic sea surface conditions: Anintercomparison of lipid biomarker proxies, instrumental andnumerical-model data
Source: Copernicus journal article supplement (doi:10.5194/cp-2021-19), 2021-03-01
Supplement: Supplementary file 7 [file TableS2.xlsx]

## Sheet: TableS2
Table S2. SIC [%] for winter (JJA), spring (SON) and summer (DJF) and annual mean SST [°C] based on AWIESM2 for the time frame from 1951-2014.
Station Nr.	Modelled Winter SIC [%]	Modelled Spring SIC [%]	Modelled Summer SIC [%]	Modelled Annual mean SST [°C]
PS69/255-3	70	81	25	-1.12
PS69/269-1	87	87	12	-1.215
PS69/272-3	73	65	9	-1.0275
PS69/275-2	73	64	8	-1.0725
PS69/283-5	78	88	14	-1.1525
PS69/284-2	81	88	14	-1.1775
PS69/288-3	56	35	0	-0.62
PS69/292-3	87	69	1	-0.9175
PS69/297-1	65	43	0	-0.7325
PS69/299-1	50	32	0	-0.9125
PS69/302-3	53	79	16	-0.96
PS104/012-4	54	32	0	-0.7
PS104/014-2	61	38	0	-0.675
PS104/017-2	86	60	1	-0.775
PS104/022-3	75	78	17	-1.185
PS104/043-3	89	87	10	-1.1825
PS111/13-2	83	89	25	-0.77
PS111/15-1	75	82	19	-0.6725
PS111/16-3	80	84	18	-0.6175
PS111/27-1	72	66	1	-0.8275
PS111/29-3	55	46	0	-0.725
PS111/40-2	59	53	11	-1.4575
PS111/42-1	75	68	16	-1.465
PS111/47-2	66	59	9	-1.4075
PS111/53-3	59	53	11	-1.4575
PS111/60-3	92	87	25	-1.5425
PS111/70-2	87	89	11	-1.165
PS111/80-3	92	90	17	-1.2625
PS111/98-3	94	89	21	-1.295
PS111/114-3	89	88	12	-1.0725
PS111/131-2	76	88	13	-1.1825
PS111/139-2	25	22	0	-0.5625
PS118/5-3	74	41	24	-0.7425
PS118/8-4	66	34	12	-0.4925
PS118/10-3	66	34	12	-0.4925
PS118/12-2	62	33	8	-0.3325
PS118/24-2	52	46	1	-0.32
PS118/38-5	66	41	4	-0.525
PS118/48-2	45	37	1	-0.1875
PS118/62-3	18	32	0	0.5475
PS118/75-1	29	30	0	0.2725
PS97/042-1*	0	0	0	3.6075
PS97/044-1*	0	0	0	3.3
PS97/045-1*	0	0	0	3.4075
PS97/046-6*	0	0	0	2.9675
PS97/048-1*	3	2	0	1.6375
PS97/049-2*	3	2	0	1.6375
PS97/052-3*	9	5	0	1.095
PS97/053-1*	14	7	0	0.855
PS97/054-2*	36	25	0	0.5075
PS97/056-1*	47	46	0	0.0775
PS97/059-1*	42	26	0	0.1025
PS97/060-1*	42	26	0	0.1025
PS97/061-1*	43	29	0	0.1375
PS97/062-1*	43	29	0	0.1375
PS97/065-2*	42	26	0	0.1025
PS97/067-2*	42	26	0	0.1025
PS97/068-2*	49	42	0	-0.02
PS97/069-1*	48	33	1	0.005
PS97/072-2*	47	25	1	-0.0675
PS97/073-2*	44	23	0	0.0975
PS97/074-1*	15	7	0	0.7775
PS97/077-1*	8	4	0	1.5025
PS97/079-1*	0	1	0	2.1875
PS97/080-2*	0	0	0	2.4
PS97/083-1*	0	0	0	5.4425
PS97/084-2*	0	0	0	3.1675
