# Supplementary material for: Elucidating modern West Antarctic sea surface conditions: Anintercomparison of lipid biomarker proxies, instrumental andnumerical-model data
Source: Copernicus journal article supplement (doi:10.5194/cp-2021-19), 2021-03-01
Supplement: Supplementary file 9 [file TableS3.xlsx]

## Sheet: TableS3
Table S3. Satellite-derived mean monthly sea ice concentrations for spring (SON), summer (DJF) and winter (JJA) including standard deviations. Data are averaged over the period from October 1978 to February of the individual expedition year; PS69 (2006), PS97 (2016), PS104 (2017), PS111 (2018), PS118 (2019). Downloaded from the National Snow and Ice Data Center, NSIDC; Cavalieri et al. (1996).
Station Nr.	Satellite Winter SIC [%]	Satellite Winter SIC SD [%]	Satellite Spring SIC [%]	Satellite Spring SIC SD [%]	Satellite Summer SIC [%]	Satellite Summer SIC SD [%]
PS69/255-3	78.9235	6.61624	82.6747	8.109	67.7571	28.9924
PS69/269-1	85.1358	6.14832	84.7181	10.9335	19.6381	25.0316
PS69/272-3	81.6148	5.23352	82.9157	6.23649	31.9	31.1811
PS69/275-2	80.3753	4.94948	80.8675	7.94587	23.9143	28.7952
PS69/283-5	83.9753	6.67543	86.9687	8.03775	35.2714	29.3548
PS69/284-2	85.1358	6.14832	84.7181	10.9335	19.6381	25.0316
PS69/288-3	84.2519	5.83659	79.5422	15.5975	39.5286	37.2544
PS69/292-3	69.6395	3.50463	69.6241	5.41411	53.3238	24.0842
PS69/297-1	86.5432	5.27193	82.8241	12.3834	39.0095	32.7643
PS69/299-1	84.7704	4.96217	83.5036	10.687	39.7476	31.3007
PS69/302-3	78.5333	6.08342	82.1108	6.22389	63.6476	31.0127
PS104/012-4	68.2351	8.46085	60.1103	21.8995	38.9026	38.0766
PS104/014-2	78.8912	6.99978	70.5379	21.4512	36.0889	38.7844
PS104/017-2	77.4351	4.74118	74.5034	10.4203	33.6308	30.5172
PS104/022-3	82.0737	7.38534	85.2379	7.4619	74.7487	30.825
PS104/043-3	75.4421	8.99992	57.2586	22.1593	4.04103	9.47714
PS111/13-2	73.8598	3.89387	70.8504	8.33462	34.3667	29.552
PS111/15-1	84.3145	4.54004	79.2538	9.38386	33.87	28.9312
PS111/16-3	84.8855	3.6095	79.8353	8.8133	26.49	29.462
PS111/27-1	79.4256	2.76749	76.0639	5.51632	24.7133	26.6525
PS111/29-3	78.1983	4.20037	73.0017	8.30011	21.96	24.617
PS111/40-2	69.4393	4.27892	68.5613	5.76919	59.0333	17.997
PS111/42-1	75.7846	4.58048	75.0958	5.88856	62.4533	21.814
PS111/47-2	64.9812	5.90464	63.3983	8.22281	51.9267	23.5178
PS111/53-3	69.4393	4.27892	68.5613	5.76919	59.0333	17.997
PS111/60-3	91.4564	4.53263	87.6202	7.71173	68.9567	23.214
PS111/70-2	94.8034	2.34506	93.6874	3.09013	60.07	32.9919
PS111/80-3	92.8684	3.22887	91.7445	3.7526	65.2133	31.2874
PS111/98-3	85.8496	9.14764	85.3412	9.54242	77.8267	22.1141
PS111/114-3	94.1197	2.60412	93.1227	3.23216	62.4033	31.8952
PS111/131-2	96.0718	2.74458	93.9462	4.26095	74.37	23.4645
PS111/139-2	70.1538	4.79651	63.0185	8.55415	22.0467	20.2858
PS118/5-3	93.4167	6.37303	86.423	18.8508	72.3675	34.1184
PS118/8-4	82.86	11.6651	63.3049	24.2832	36.9984	32.6009
PS118/10-3	82.86	11.6651	63.3049	24.2832	36.9984	32.6009
PS118/12-2	77.6467	12.409	55.3049	25.7067	29.2033	30.756
PS118/24-2	78.2233	12.714	51.2557	29.1887	18.8195	26.8615
PS118/38-5	64.2833	13.7753	38.4525	23.5223	14.839	21.0664
PS118/48-2	71.5067	17.0687	41.6721	30.0507	12.6439	22.3638
PS118/62-3	67.85	19.5226	44.9705	33.0333	5.17724	13.7764
PS118/75-1	57.7867	21.3033	28.6557	28.0782	6.0878	14.6815
PS97/042-1*	1.10631	4.93859	0.0353982	0.181718	0	0
PS97/044-1*	3.57117	9.268	0.884956	3.18454	0.0210526	0.224781
PS97/045-1*	2.58018	7.71053	0.495575	2.037	0.00701754	0.0749269
PS97/046-6*	2.76757	8.44492	0.276106	1.31701	0	0
PS97/048-1*	10.2198	17.9829	4.03186	8.37294	0	0
PS97/049-2*	12.8324	19.7235	6.38938	11.6454	0	0
PS97/052-3*	22.573	24.7191	16.1097	21.3334	0.378947	2.86762
PS97/053-1*	20.0865	23.9952	19.2602	23.3111	0.273684	2.38123
PS97/054-2*	20.4685	20.8586	11.023	15.3476	0.491228	0.851502
PS97/056-1*	25.8306	23.0483	10.8071	16.1762	4.79298	3.27953
PS97/059-1*	24.8288	20.2848	13.5894	16.109	4.17895	2.237
PS97/060-1*	30.0216	22.0715	12.4991	16.8389	1.85614	2.10596
PS97/061-1*	27.3225	21.3133	12.4743	16.1561	1.82807	2.03263
PS97/062-1*	27.3225	21.3133	12.4743	16.1561	1.82807	2.03263
PS97/065-2*	30.0216	22.0715	12.4991	16.8389	1.85614	2.10596
PS97/067-2*	31.8306	22.6387	12.1097	17.1821	0.821053	1.83638
PS97/068-2*	33.7802	23.0712	15.154	19.2026	4.94737	3.40339
PS97/069-1*	40.5225	24.0711	14.4	19.7962	0.414035	2.27767
PS97/072-2*	50.4901	24.7619	17.377	22.547	1.38246	5.24518
PS97/073-2*	50.2162	25.6803	17.5823	23.0201	1.74386	5.98384
PS97/074-1*	12.3856	19.1223	6.04956	13.395	0.0280702	0.137942
PS97/077-1*	11.5568	17.6835	5.35929	11.9837	0.0421053	0.134292
PS97/079-1*	6.3964	15.3115	2.97699	8.73383	0.0245614	0.262244
PS97/080-2*	5.03063	14.0117	1.98938	7.36545	0.00701754	0.0749269
PS97/083-1*	0.843243	4.21404	0.0247788	0.228556	0	0
PS97/084-2*	2.16577	9.4681	0.378761	2.15992	0	0
