# Supplementary figures and images for: Elucidating modern West Antarctic sea surface conditions: Anintercomparison of lipid biomarker proxies, instrumental andnumerical-model data
Source: Copernicus journal article supplement (doi:10.5194/cp-2021-19), 2021-03-01

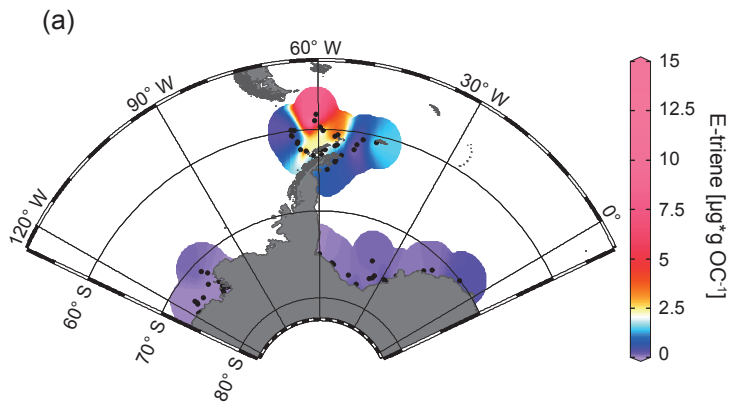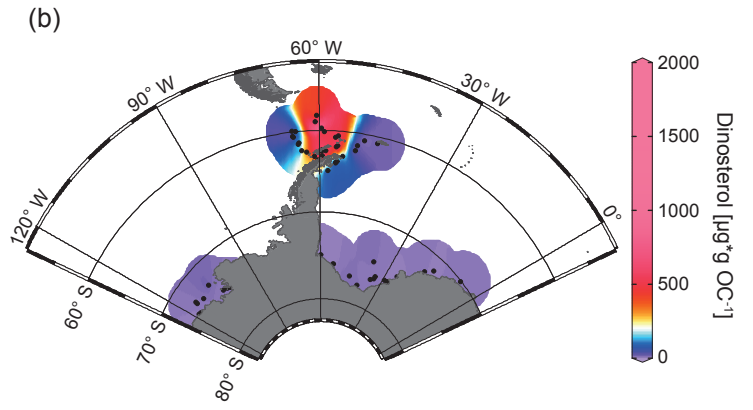

Supplement: Supplementary file 1 [file cp-2021-19-supplement.zip]

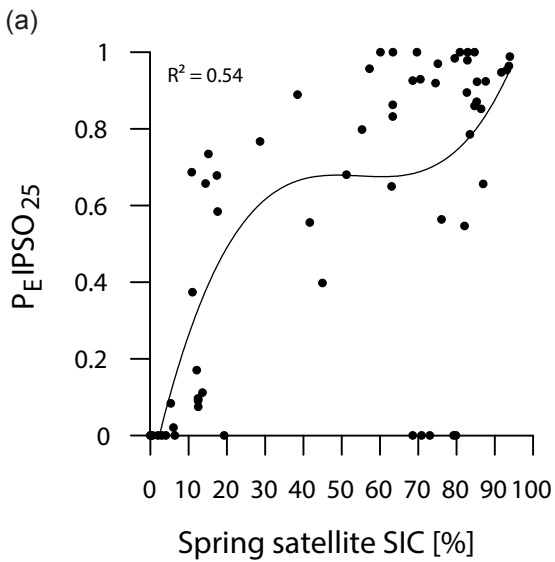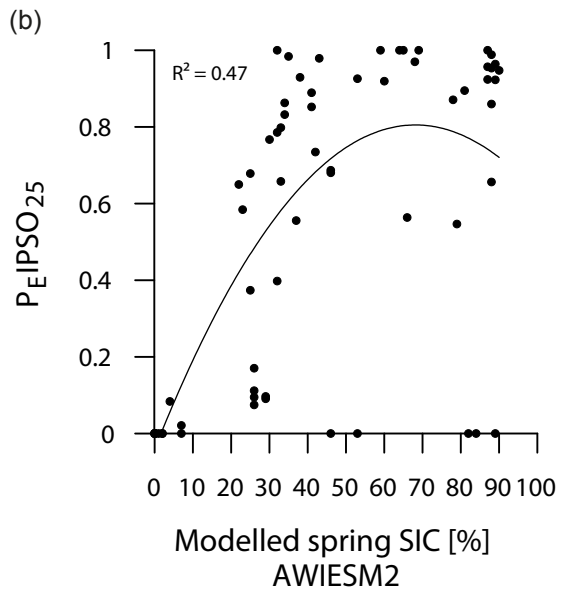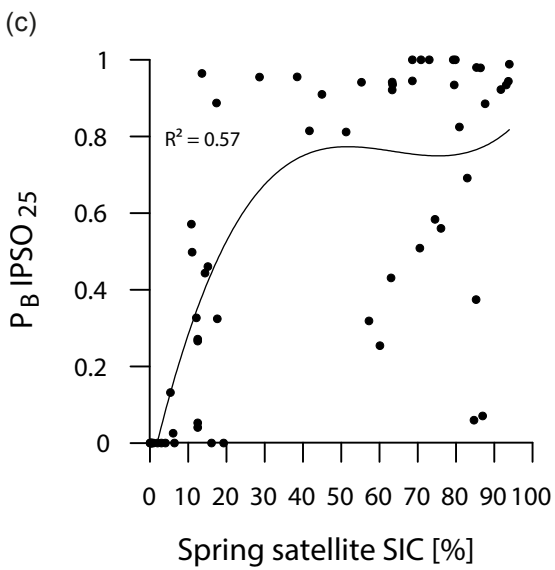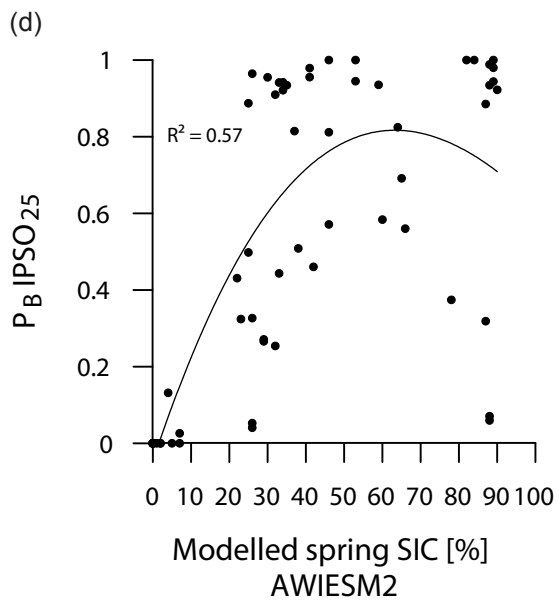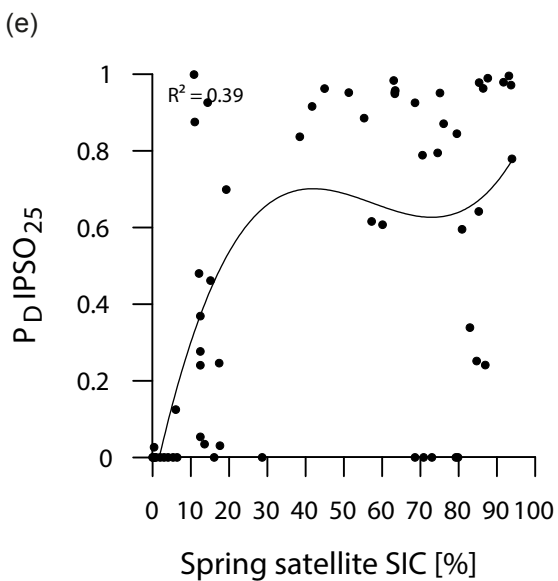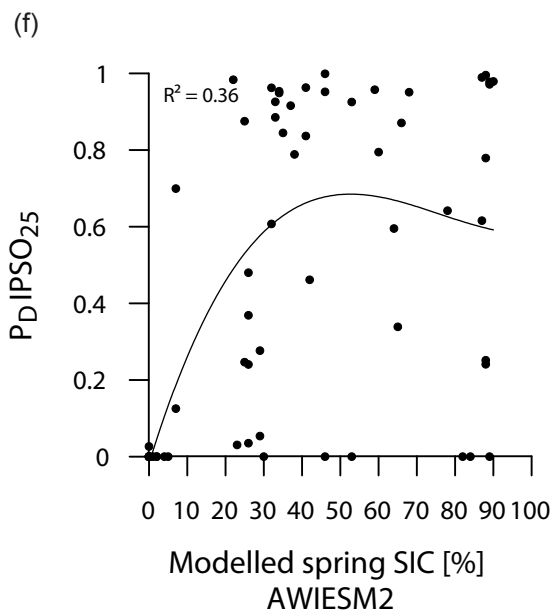

Supplement: Supplementary file 2 [file cp-2021-19-supplement.zip]

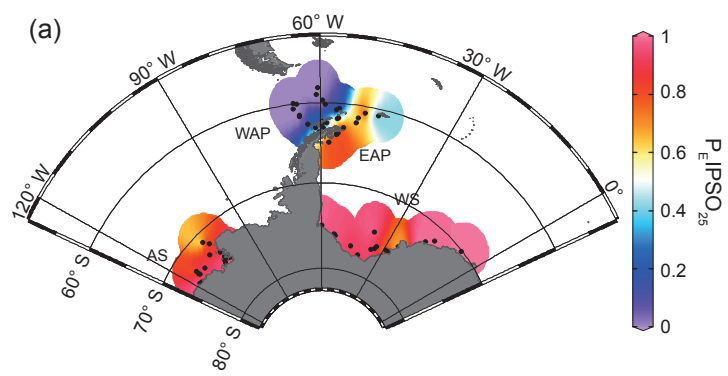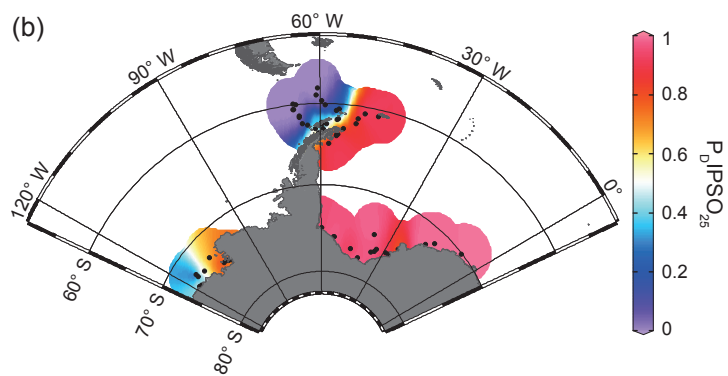

Supplement: Supplementary file 3 [file cp-2021-19-supplement.zip]

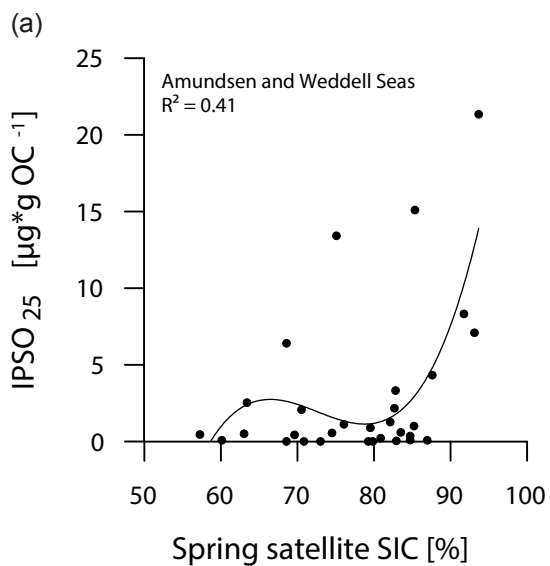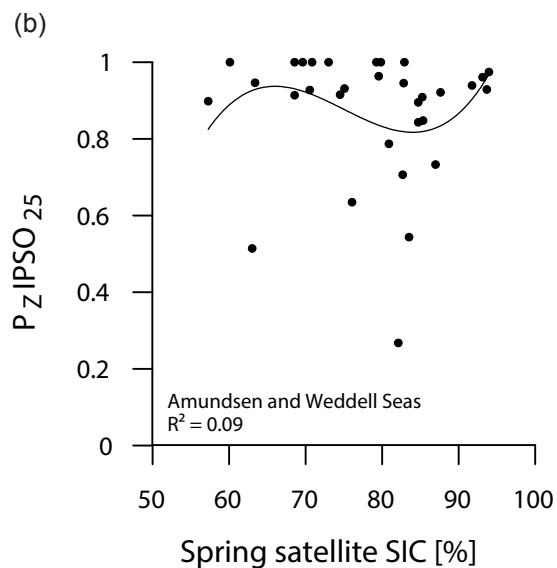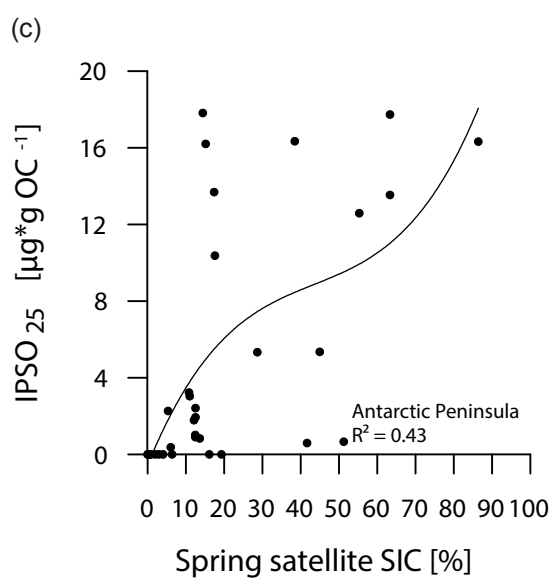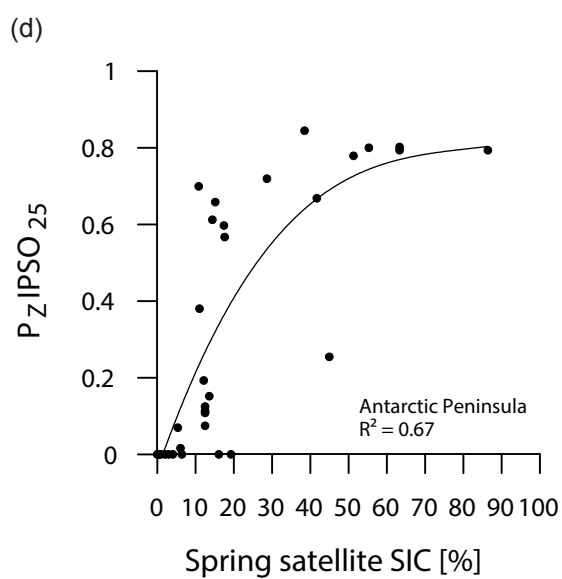

Supplement: Supplementary file 4 [file cp-2021-19-supplement.zip]
